# Supplementary material for: Isavuconazole: Thermodynamic Evaluation of Processes Sublimation, Dissolution and Partition in Pharmaceutically Relevant Media
Source: MDPI journal article supplement (doi:10.3390/molecules26164759), 2021-08-06
Supplement: s1 [file s1]

## **Supplementary material**

for

### **Isavuconazole: thermodynamic evaluation of processes sublimation, dissolution and partition in pharmaceutically relevant media**

Marina V. Ol'khovich, Angelica V. Sharapova, Svetlana V. Blokhina, German L. Perlovich\*

*Institute of Solution Chemistry, Russian Academy of Sciences,*

*1 Akademicheskaya Street, 153045, Ivanovo, Russia*

**Table S1.** Cluster of structurally related compounds for drug studied (IVZ)

| No | Name                         | CAS number  | $\Delta_{cr}^g H_m^o$<br>kJ·mol <sup>-1</sup> | $\Delta_{cr}^g G_m^o$<br>kJ·mol <sup>-1</sup> | $\alpha$<br>Å <sup>3</sup> | $\Sigma C_a$ | $\Sigma C_d$ | $\Sigma(C_a)/\alpha$ | $\Sigma C_{ad}$ | $\Sigma(C_d)/\alpha$ | $\Sigma(C_{ad})/\alpha$ | Ref.      |
|----|------------------------------|-------------|-----------------------------------------------|-----------------------------------------------|----------------------------|--------------|--------------|----------------------|-----------------|----------------------|-------------------------|-----------|
| 1  | Flurbiprofen                 | 5104-49-4   | 110.2                                         | 53.3                                          | 25.936                     | 5.67         | -2.82        | 0.219                | 8.49            | -0.109               | 0.327                   | [1-2]     |
| 2  | 2-fluorobenzoic acid;        | 445-29-4    | 94.4                                          | 35.5                                          | 12.606                     | 4.14         | -3.15        | 0.328                | 7.29            | -0.25                | 0.579                   | [3]       |
| 3  | 3-fluorobenzoic acid         | 455-38-9    | 93.6                                          | 34.4                                          | 12.606                     | 4.14         | -2.89        | 0.328                | 7.03            | -0.229               | 0.557                   | [3]       |
| 4  | 4-fluorobenzoic acid         | 456-22-4    | 93.1                                          | 36.8                                          | 12.606                     | 4.21         | -2.89        | 0.334                | 7.1             | 0.234                | 0.563                   | [4-5]     |
| 5  | 2,2'-difluorobiphenyl        | 388-82-9    | 95.0                                          | 32.3                                          | 19.912                     | 1.04         | 0            | 0.052                | 1.04            | 0                    | 0.052                   | [6]       |
| 6  | 4,4'-difluorobiphenyl        | 398-23-2    | 91.2                                          | 30.2                                          | 19.912                     | 1.13         | 0            | 0.057                | 1.13            | 0                    | 0.057                   | [6]       |
| 7  | 1-methyl-1-phenylethanol     | 617-94-7    | 82.3                                          | 22.0                                          | 16.576                     | 1.83         | -1.87        | 0.111                | 3.7             | -0.11                | 0.223                   | [7]       |
| 8  | 1,1-diphenylethanol          | 599-67-7    | 105.0                                         | 39.1                                          | 24.401                     | 2.13         | -1.87        | 0.087                | 4               | -0.07                | 0.164                   | [8]       |
| 9  | 4-Fluorophenol               | 371-41-5    | 74.1                                          | 19.9                                          | 10.617                     | 1.11         | -2.7         | 0.104                | 3.8             | -0.254               | 0.358                   | [9]       |
| 10 | 2-Naphthalenecarbonitrile    | 613-46-7    | 92.1                                          | 33.8                                          | 19.564                     | 2.54         | 0            | 0.13                 | 2.54            | 0                    | 0.13                    | [10]      |
| 11 | Bicalutamide                 | 90357-06-5  | 124.7                                         | 63.7                                          | 36.871                     | 8.1          | -4.4         | 0.22                 | 12.49           | -0.119               | 0.339                   | [11]      |
| 12 | 3-Fluorobenzonitrile         | 403-54-3    | 65.4                                          | 15.8                                          | 12.203                     | 1.72         | 0            | 0.141                | 1.72            | 0                    | 0.141                   | [12]      |
| 13 | 4-Fluorobenzonitrile         | 1194-02-1   | 67.7                                          | 17.6                                          | 12.203                     | 1.87         | 0            | 0.153                | 1.87            | 0                    | 0.15                    | [12]      |
| 14 | 4-Iodobenzonitrile           | 3058-39-7   | 88.0                                          | 32.8                                          | 17.322                     | 1.9          | 0            | 0.11                 | 1.9             | 0                    | 0.11                    | [13]      |
| 15 | 4-Bromobenzonitrile          | 623-00-7    | 80.8                                          | 28.5                                          | 14.92                      | 1.83         | 0            | 0.123                | 1.83            | 0                    | 0.123                   | [14]      |
| 16 | 4-chlorobenzonitrile         | 623-03-0    | 76.7                                          | 23.5                                          | 14.222                     | 1.86         | 0            | 0.131                | 1.86            | 0                    | 0.131                   | [15]      |
| 17 | <i>p</i> -fluoroacetophenone | 403-42-9    | 71.6                                          | 17.6                                          | 14.167                     | 1.95         | 0            | 0.138                | 1.95            | 0                    | 0.138                   | [16]      |
| 18 | Isavuconazole                | 241479-67-4 | 138.1                                         | 68.9                                          | 44.097                     | 8.14         | -1.87        | 0.185                | 10              | -0.042               | 0.227                   | Our study |

Thermodynamic functions have been obtained at 298.15 K

## References

1. Perlovich, G.L.; Kurkov, S.V.; Bauer-Brandl, A. Thermodynamics of Solutions II: Flurbiprofen and Diflunisal as Models for Studying Solvation of Drug Substances. *Eur. J. Pharm. Sci.* **2003**, *19*, 423-432. [https://doi.org/10.1016/S0928-0987\(03\)00145-3](https://doi.org/10.1016/S0928-0987(03)00145-3).
2. Kurkov, S.V., Perlovich, G.L. Thermodynamic studies of Fenbufen, Diflunisal, and Flurbiprofen: Sublimation, solution and solvation of biphenyl substituted drugs. *Int. J. Pharmaceut.* **2008**, *357*, 100–107. <https://doi.org/10.1016/j.ijpharm.2008.01.059>.
3. Monte, M.J.S., Hillesheim, D.M., Thermodynamic study on the sublimation of the three iodobenzoic acids and of 2-fluoro- and 3-fluorobenzoic acids. *J. Chem. Thermodyn.* **2000**, *32*, 1727–1735. <https://doi.org/10.1006/jcht.2000.0705>.
4. Cox, J.D., Gundry, H.A., Harrop, D., Head, A.J. Thermodynamic properties of fluorine compounds. 9. Enthalpies of formation of some compounds containing the pentafluorophenyl group. *J. Chem. Thermodyn.* **1969**, *1*, 77–87. [https://doi.org/10.1016/0021-9614\(69\)90038-X](https://doi.org/10.1016/0021-9614(69)90038-X).
5. J. D. Cox and G. Pilcher, Thermochemistry of Organic and Organometallic Compounds (Academic, New York, 1970).
6. Smith N.K., Gorin G., Good W.D., McCullough J.P., The Heats of Combustion, Sublimation, and Formation of Four Dihalobiphenyls. *J. Phys. Chem. A.* **1964**, *68*, 940–946. <https://doi.org/10.1021/j100786a043>
7. Verevkin, S.P. Thermochemical Properties of Triphenylalkanes and Tetraphenylmethane. Strain in Phenyl Substituted Alkanes. *J. Chem. Eng. Data.* **1999**, *44*, 1245-1251. <https://doi.org/10.1021/je9802726>.
8. Verevkin, S.P., Thermochemistry of Alcohols: Experimental Standard Molar Enthalpies of Formation and Strain of Some Alkyl and Phenyl Congested Alcohols *Struct. Chem.* **1998**, *9*, 375-382. <https://doi.org/10.1023/A:1022471228499>
9. Almeida, A.R.R.P., Monte, M.J.S. Crystalline and liquid vapour pressures of the four p-monohalophenols: A thermodynamic study of their phase transitions. *J. Chem. Thermodyn.* **2013**, *65*, 150–158. <https://doi.org/10.1016/j.jct.2013.05.047>.
10. Ribeiro da Silva, M.A.V., Lobo Ferreira, A.I.M.C., Barros, A.L.M., Bessa, A.R.C., Brito, B.C.S.A., Vieira, J.A.S., Martins, S.A.P. Standard molar enthalpies of formation of 1- and 2-cyanonaphthalene. *J. Chem. Thermodyn.* **2011**, *43*, 1306–1314. <https://doi.org/10.1006/jcht.2001.0905>.
11. Perlovich, G.L., Blokhina, S.V., Manin, N.G., Volkova, T.V., Tkachev, V.V. Polymorphism and solvatomorphism of bicalutamide. *J. Therm. Anal. Calorim.* **2013**, *111*, 655–662. <https://doi.org/10.1007/s10973-012-2540-y>.
12. Ribeiro da Silva, M.A.V., Monte, M.J.S., Rocha, I.M., Cimas, A. Energetic Study Applied to the Knowledge of the Structural and Electronic Properties of Monofluorobenzonitriles. *J. Org. Chem.* **2012**, *77*, 4312-4322. <https://doi.org/10.1021/jo3002968>.

13. Rocha, I.M., Fialho, R.L., Marques, J.J., Dariva, C., Pessoa, F.L.P. Effect of water content on the equilibrium pressure of (carbon dioxide + decane and + decalin) from T = (313.15 to 333.15) K. *J. Chem. Thermodyn.* **2013**, 65, 11-17. <https://doi.org/10.1016/j.jct.2013.05.015>.
14. Rocha, I.M., Galva, T.L.P., Ribeiro da Silva, M.D.M.C., Ribeiro da Silva, M.A.V. Energetic study of bromobenzonitrile isomers: insights on the intermolecular interactions, aromaticity and electronegativity. *Struct. Chem.* **2013**, 24, 1935–1944. <https://doi.org/10.1007/s11224-013-0278-1>.
15. Rocha, I.M. Thermodynamic Study of Chlorobenzonitrile Isomers: A Survey on the Polymorphism, Pseudosymmetry, and the Chloro···Cyano Interaction. *J. Phys. Chem. A.* **2014**, 118, 1502-1510. <https://doi.org/10.1021/jp410187q>.
16. Almeida, A., Monte, M. The influence of the halogen atoms and acetyl group on vapour pressures and related properties of the p-haloacetophenones. *J. Chem. Thermodynam.* **2016**, 92, 118–125. <https://doi.org/10.1016/j.jct.2015.09.004>.

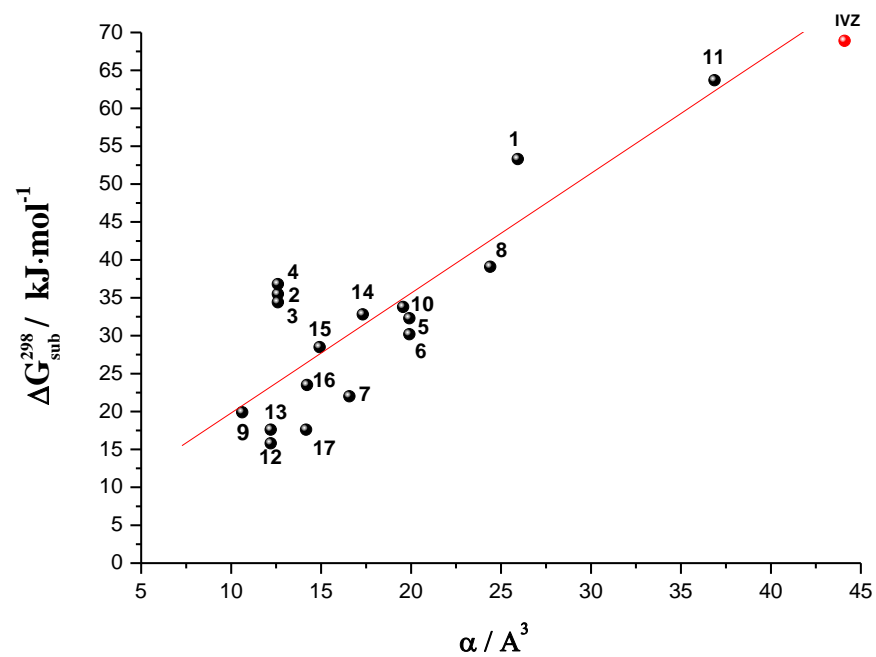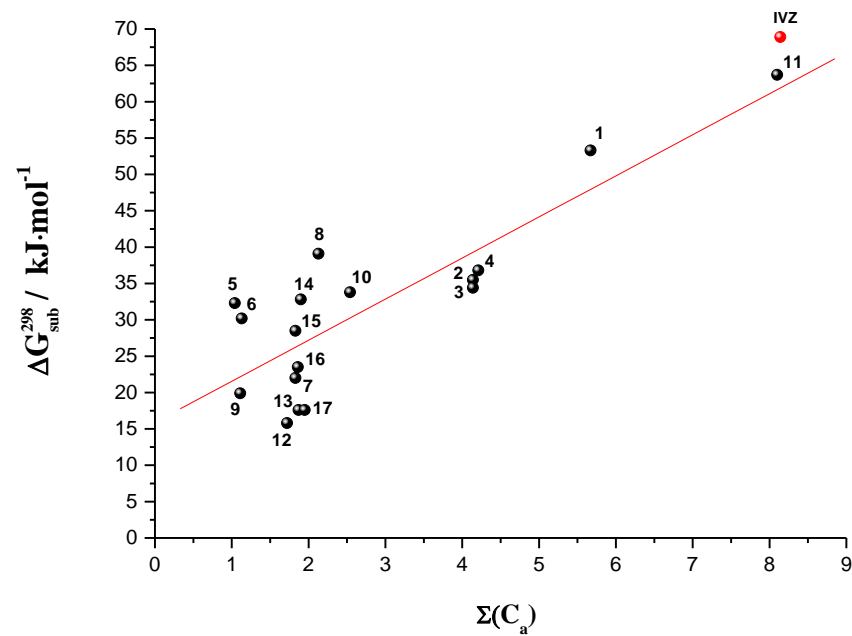

**Figure S1.** Correlation sublimation Gibbs energy and HYBOT descriptors for the test set of IVZ: a) - molecular polarizability; b) - total acceptor ability.

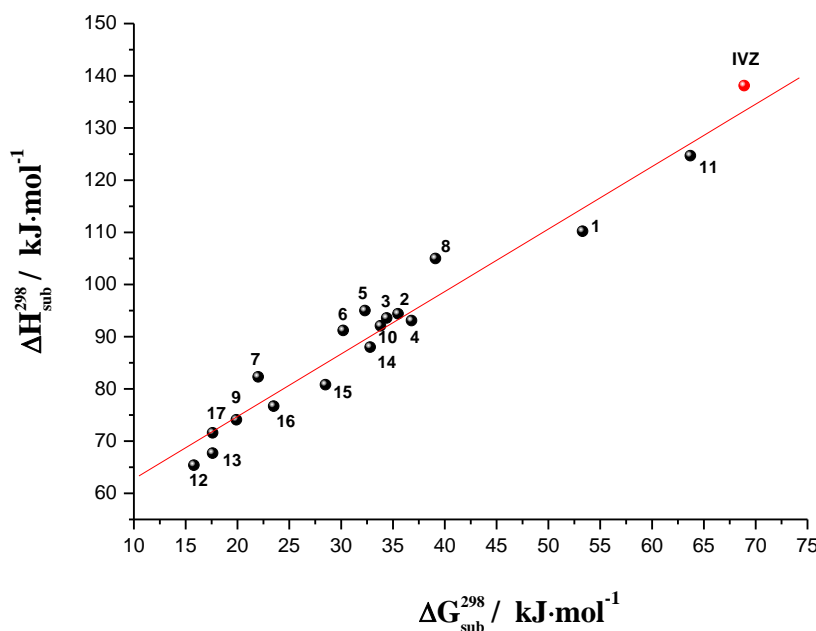

**Figure S2.** Correlation between Gibbs energy and enthalpy of sublimation for the test set of IVZ.

The analogous analysis for estimation of the sublimation thermodynamic functions of Isavuconazole (IVZ) with applying database clusterization is presented for Bicalutamide (as an ancestor of the cluster). It was selected 45 structural relative compounds to Bicalutamide with  $0.75 < T_c < 1$  (Isavuconazole was excluded from this set). The results of the clusterization are shown in Table S2. Correlations between sublimation Gibbs energy and HYBOT descriptors for the test set of Bicalutamide: a) - molecular polarizability; b) - total acceptor ability are presented in Figure S3.

Within the formed cluster for Bicalutamide, we tried to find a correlation between the Gibbs energies of sublimation  $\Delta_{cr}^g G_m^0(298.15K)$  and the physicochemical descriptors of HYBOT. Using the entire set of descriptors, the best correlations were observed for molecular polarizability ( $\alpha$ ) (Figure S3a) and total acceptor ability of a molecule to form hydrogen bonds ( $\Sigma(C_a)$ ) (Figure S3b). As a result, a two-parameter correlation equation was obtained to estimate  $\Delta_{cr}^g G_m^0(298.15K)$ :

$$\Delta_{cr}^g G_m^0(298.15K) = (17.89 \pm 3.74) + (0.380 \pm 0.209) \cdot \alpha + (5.384 \pm 0.674) \cdot \Sigma(C_a)$$

$$R = 0.8475; SD = 7.26 \text{ kJ}\cdot\text{mol}^{-1}; n = 44; F = 53.5$$

In order to obtain a complete thermodynamic picture of IVZ sublimation process, it was necessary to estimate the value of enthalpy. For this purpose, we used the correlation dependence between the Gibbs energies and the enthalpies of sublimation (the so-called "compensation effect") within the selected cluster (Figure S4). As a result, the following equation was obtained:

$$\Delta_{cr}^g H_m^0(298.15K) = (45.5 \pm 3.5) + (1.329 \pm 0.073) \cdot \Delta_{cr}^g G_m^0(298.15K)$$

$$R = 0.9414; SD = 6.43 \text{ kJ}\cdot\text{mol}^{-1}; n = 45;$$

The sublimation thermodynamic functions of IVZ calculated from these equations are in good agreement with the experimental values:  $\Delta_{cr}^g G_m^0(298.15K)_{cal} = 78.5 \text{ kJ}\cdot\text{mol}^{-1}$  and

$$\Delta_{cr}^g G_m^0(298.15K)_{exp} = 68.9 \pm 0.2 \text{ kJ}\cdot\text{mol}^{-1}; \Delta_{cr}^g H_m^0(298.15K)_{cal} = 149.8 \text{ kJ}\cdot\text{mol}^{-1} \text{ and}$$

$$\Delta_{cr}^g H_m^0(298.15K)_{exp} = 138.1 \pm 0.5 \text{ kJ}\cdot\text{mol}^{-1}.$$

**Table S2.** Cluster of structurally related compounds for compound Bicalutamide

| No | Name                         | CAS<br>number | $\Delta_{cr}^g H_m^o$<br>kJ·mol <sup>-1</sup> | $\Delta_{cr}^g G_m^o$<br>kJ·mol <sup>-1</sup> | $\alpha$<br>Å <sup>3</sup> | $\Sigma C_a$ | $\Sigma C_d$ | $\Sigma C_{ad}$ | $\Sigma(C_a)/\alpha$ | $\Sigma(C_d)/\alpha$ | $\Sigma(C_{ad})/\alpha$ |
|----|------------------------------|---------------|-----------------------------------------------|-----------------------------------------------|----------------------------|--------------|--------------|-----------------|----------------------|----------------------|-------------------------|
| 1  | Acetamide                    | 103-84-4      | 99.8                                          | 40.5                                          | 15.735                     | 3.25         | -1.97        | 5.22            | 0.206                | -0.125               | 0.331                   |
| 2  | Paracetamol                  | 103-90-2      | 117.9                                         | 60                                            | 16.009                     | 4.15         | -4.53        | 8.68            | 0.259                | -0.283               | 0.542                   |
| 3  | Phenacetine                  | 62-44-2       | 121.8                                         | 52.3                                          | 19.679                     | 3.75         | -1.9         | 5.65            | 0.191                | -0.097               | 0.287                   |
| 4  | Mefenamic Acid               | 61-68-7       | 136.3                                         | 59.2                                          | 27.504                     | 6.02         | -4.49        | 10.52           | 0.219                | -0.163               | 0.382                   |
| 5  | Flufenamic acid              | 530-78-9      | 121.2                                         | 54.3                                          | 25.396                     | 5.47         | -4.4         | 9.87            | 0.215                | -0.173               | 0.389                   |
| 6  | Niflumic acid                | 4394-00-7     | 130.2                                         | 61.3                                          | 24.687                     | 6.52         | -5.16        | 11.68           | 0.264                | -0.209               | 0.473                   |
| 7  | N-(2-methylphenyl)acetamide  | 120-66-1      | 97.1                                          | 40.9                                          | 17.57                      | 3.59         | -2.53        | 6.12            | 0.205                | -0.144               | 0.349                   |
| 8  | N-(4-methylphenyl)acetamide  | 103-89-9      | 99                                            | 44.5                                          | 17.57                      | 3.14         | -1.9         | 5.04            | 0.179                | -0.108               | 0.287                   |
| 9  | p-acetaminobenzaldehyde      | 122-85-0      | 99.1                                          | 44.1                                          | 17.724                     | 4.23         | -1.9         | 6.13            | 0.238                | -0.107               | 0.346                   |
| 10 | benzanilide                  | 93-98-1       | 99.2                                          | 51.3                                          | 23.56                      | 3.13         | -2.53        | 5.66            | 0.133                | -0.107               | 0.24                    |
| 11 | N-acetyl-1-naphthylamine     | 575-36-0      | 94                                            | 47.9                                          | 23.005                     | 3.79         | -2.53        | 6.32            | 0.165                | -0.11                | 0.275                   |
| 12 | 2-fluorobenzoic acid         | 445-29-4      | 94.4                                          | 35.5                                          | 12.606                     | 4.14         | -3.15        | 7.29            | 0.328                | -0.25                | 0.579                   |
| 13 | 3-fluorobenzoic acid         | 455-38-9      | 93.6                                          | 34.4                                          | 12.606                     | 4.14         | -2.89        | 7.03            | 0.328                | -0.229               | 0.557                   |
| 14 | 4-fluorobenzoic acid         | 456-22-4      | 93.1                                          | 36.8                                          | 12.606                     | 4.21         | -2.89        | 7.1             | 0.334                | -0.229               | 0.563                   |
| 15 | 2,2'-difluorobiphenyl        | 388-82-9      | 95                                            | 32.3                                          | 19.912                     | 1.04         | 0            | 1.04            | 0.052                | 0                    | 0.052                   |
| 16 | 4,4'-difluorobiphenyl        | 398-23-2      | 91.2                                          | 30.2                                          | 19.912                     | 1.13         | 0            | 1.13            | 0.057                | 0                    | 0.057                   |
| 17 | a,a-dimethylbenzyl alcohol   | 617-94-7      | 82.3                                          | 22                                            | 16.576                     | 1.83         | -1.87        | 3.7             | 0.111                | -0.113               | 0.223                   |
| 18 | acetylglycine anilide        | 34329-64-1    | 125.4                                         | 59.9                                          | 22.877                     | 6.56         | -4.41        | 10.97           | 0.287                | -0.193               | 0.48                    |
| 19 | N-acetyl-1-naphthylamine     | 575-36-0      | 94.1                                          | 47.9                                          | 23.005                     | 3.79         | -2.53        | 6.32            | 0.165                | -0.11                | 0.275                   |
| 20 | N-phenyl benzylamine         | 103-32-2      | 104.4                                         | 36.9                                          | 23.406                     | 2.42         | -1.46        | 3.88            | 0.103                | -0.062               | 0.166                   |
| 21 | 1,1-diphenylethanol          | 599-67-7      | 105                                           | 39.1                                          | 24.401                     | 2.13         | -1.87        | 4               | 0.087                | -0.077               | 0.164                   |
| 22 | 2'-Hydroxyacetanilide        | 614-80-2      | 121.8                                         | 52.8                                          | 16.009                     | 3.63         | -5.53        | 9.16            | 0.226                | -0.345               | 0.572                   |
| 23 | 3-Acetamidophenol            | 621-42-1      | 111                                           | 56.4                                          | 16.009                     | 4.15         | -4.9         | 9.05            | 0.259                | -0.306               | 0.565                   |
| 24 | N-phenyl-Anthranilic acid    | 91-40-7       | 126                                           | 58.9                                          | 23.834                     | 5.59         | -4.4         | 9.99            | 0.235                | -0.185               | 0.419                   |
| 25 | 2-(acetylamino)-Benzoic acid | 89-52-1       | 115.5                                         | 54.4                                          | 17.998                     | 6.82         | -5.68        | 12.51           | 0.379                | -0.316               | 0.695                   |
| 26 | 4-Cyanobenzoic acid          | 619-65-8      | 112.8                                         | 50.7                                          | 14.557                     | 5.14         | -2.89        | 8.03            | 0.353                | -0.199               | 0.551                   |

|           |                                                                      |                    |              |             |               |             |              |              |              |               |              |
|-----------|----------------------------------------------------------------------|--------------------|--------------|-------------|---------------|-------------|--------------|--------------|--------------|---------------|--------------|
| 27        | 1-(4-fluorophenyl)pyrrole                                            | 81329-31-9         | 78.9         | 25.4        | 18.002        | 1.46        | 0            | 1.46         | 0.081        | 0             | 0.081        |
| 28        | 3-Fluoronitrobenzene                                                 | 402-67-5           | 72.3         | 17.1        | 12.184        | 1.32        | 0            | 1.32         | 0.108        | 0             | 0.108        |
| 29        | 4-Fluoronitrobenzene                                                 | 350-46-9           | 70.9         | 18.9        | 12.184        | 1.44        | 0            | 1.44         | 0.118        | 0             | 0.118        |
| 30        | 2-Fluorobenzamide                                                    | 445-28-3           | 95.4         | 35.8        | 13.809        | 2.95        | -4.16        | 7.11         | 0.213        | -0.301        | 0.515        |
| 31        | 3-Fluorobenzamide                                                    | 455-37-8           | 104.1        | 42.5        | 13.809        | 2.82        | -4.16        | 6.98         | 0.204        | -0.301        | 0.505        |
| 32        | 4-Fluorobenzamide                                                    | 824-75-9           | 102.8        | 43.2        | 13.809        | 2.91        | -4.16        | 7.07         | 0.21         | -0.301        | 0.512        |
| 33        | 4-Fluorophenol                                                       | 371-41-5           | 74.1         | 19.9        | 10.617        | 1.11        | -2.7         | 3.8          | 0.104        | -0.254        | 0.358        |
| 34        | 4-(methyamino)benzoic acid                                           | 10541-83-0         | 123.9        | 55.3        | 16.009        | 5.5         | -4.37        | 9.86         | 0.343        | -0.273        | 0.616        |
| <b>35</b> | <b>Bicalutamide</b>                                                  | <b>90357-06-5</b>  | <b>124.7</b> | <b>63.7</b> | <b>36.871</b> | <b>8.1</b>  | <b>-4.4</b>  | <b>12.49</b> | <b>0.22</b>  | <b>-0.119</b> | <b>0.339</b> |
| 36        | 2-phenylcarbamoyl-3-methylquinoxaline-N-oxide                        |                    | 145.1        | 69.2        | 32.505        | 9.01        | -2.53        | 11.54        | 0.277        | -0.078        | 0.355        |
| 37        | o-Aminobenzamide                                                     | 88-68-6            | 106.8        | 46.1        | 15.377        | 4.23        | -5.16        | 9.39         | 0.275        | -0.336        | 0.611        |
| 38        | m-Aminobenzamide                                                     | 3544-24-9          | 125.3        | 57.5        | 15.377        | 4.49        | -6.29        | 10.78        | 0.292        | -0.409        | 0.701        |
| 39        | m-Aminobenzamide                                                     | 3544-24-9          | 128.6        | 57.8        | 15.377        | 4.49        | -6.29        | 10.78        | 0.292        | -0.409        | 0.701        |
| 40        | p-Aminobenzamide                                                     | 2835-68-9          | 131.2        | 61.7        | 15.377        | 4.46        | -6.94        | 11.4         | 0.29         | -0.451        | 0.741        |
| 41        | 1-[5-(4-Fluoro-phenylamino)-[1,2,4]thiadiazol-3-yl]-propan-2-ol      |                    | 124.8        | 59.1        | 25.36         | 5.18        | -3.13        | 8.31         | 0.204        | -0.123        | 0.328        |
| 42        | 3-methyl-N-(2-methylphenyl)-2-quinoxalinecarboxamide-1,4-dioxide     | 111888-46-1        | 154.8        | 71.9        | 34.34         | 9.16        | -2.53        | 11.69        | 0.267        | -0.074        | 0.341        |
| 43        | Diflunisal (Form A)                                                  | 27494-42-4         | 120.1        | 57.6        | 22.449        | 4.84        | -4.85        | 9.69         | 0.216        | -0.216        | 0.432        |
| 44        | 4'-Chloroacetanilide                                                 | 539-03-7           | 113.8        | 50.1        | 17.663        | 3.16        | -2.02        | 5.18         | 0.179        | -0.114        | 0.293        |
| 45        | 4'-Bromoacetanilide                                                  | 103-88-8           | 113.4        | 51.2        | 18.361        | 3.1         | -2.13        | 5.23         | 0.169        | -0.116        | 0.285        |
| 46        | N-(3,5-Dimethyl-adamantan-1-yl)-4-trifluoromethyl-benzenesulfonamide |                    | 107.7        | 49.6        | 37.009        | 3.07        | -1.74        | 4.8          | 0.083        | -0.047        | 0.13         |
| <b>47</b> | <b>Isavuconazole (IVZ)</b>                                           | <b>241479-67-4</b> | <b>138.1</b> | <b>68.9</b> | <b>44.097</b> | <b>8.14</b> | <b>-1.87</b> | <b>10</b>    | <b>0.185</b> | <b>-0.042</b> | <b>0.227</b> |

Thermodynamic functions have been obtained at 298.15 K



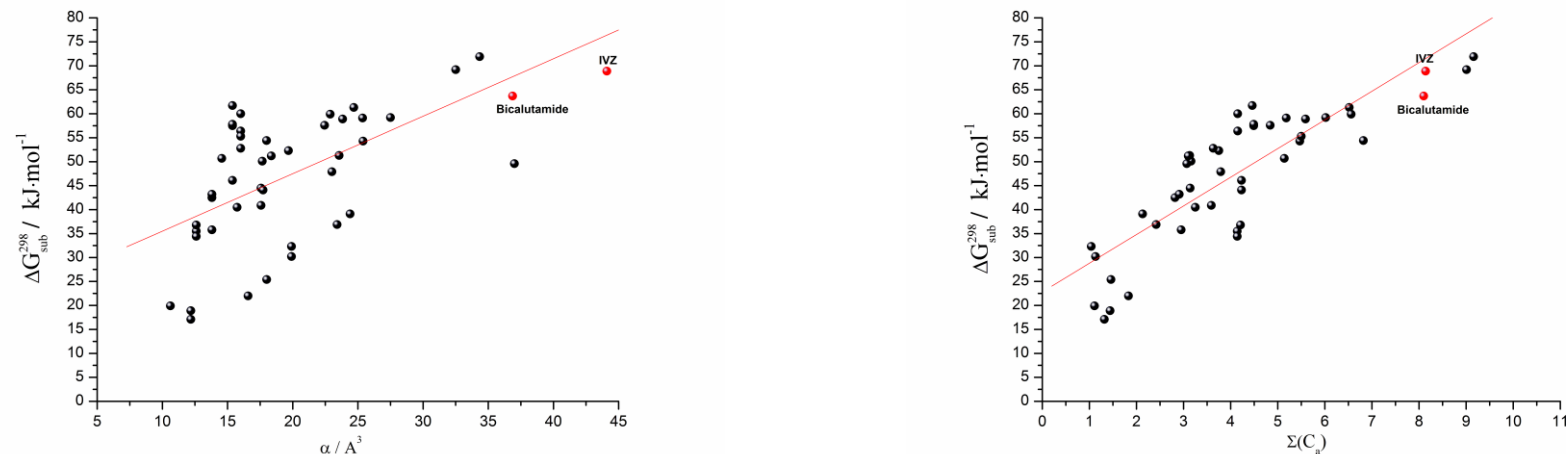

**Figure S3.** Correlation sublimation Gibbs energy and HYBOT descriptors for the test set of Bicalutamide: a) - molecular polarizability; b) - total acceptor ability.

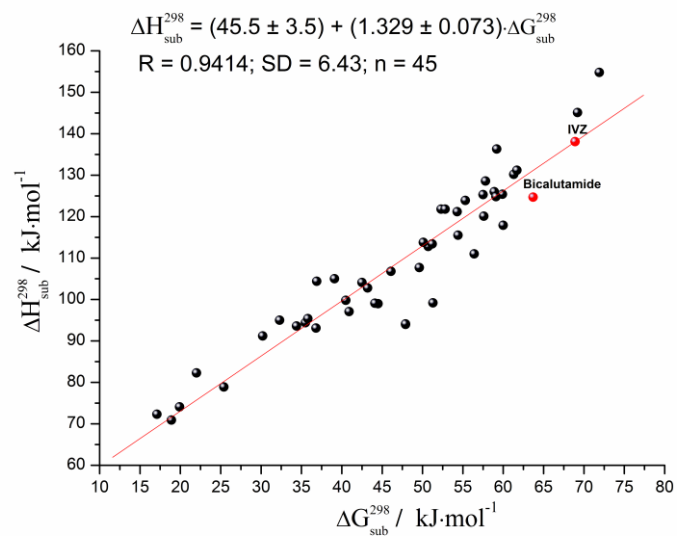

**Figure S4.** Correlation between Gibbs energy and enthalpy of sublimation for the test set of Bicalutamide.

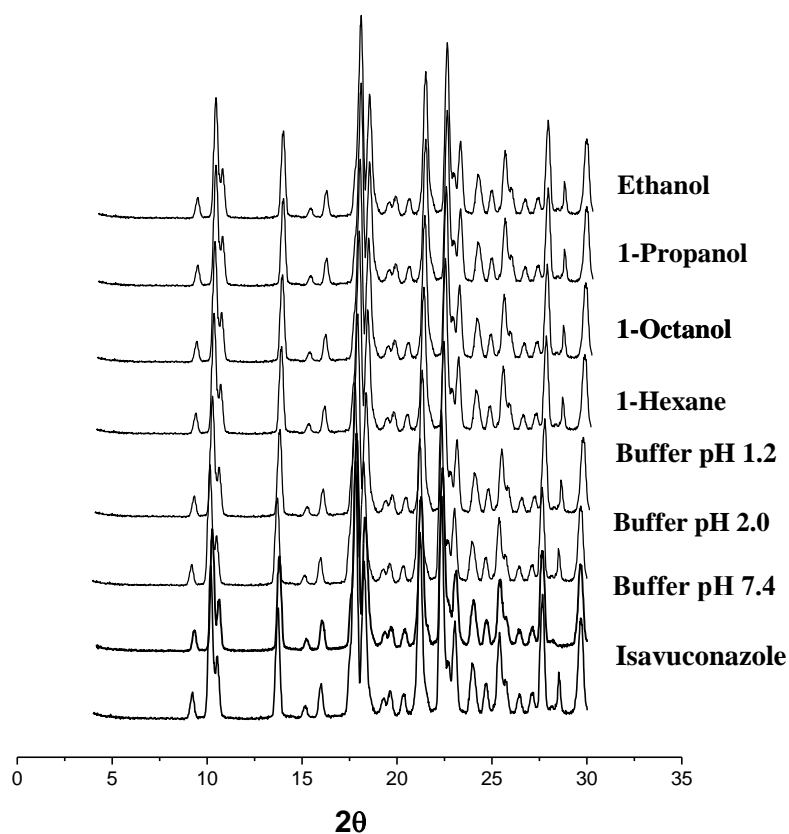

**Figure S5.** PXRD patterns of raw and equilibrate IVZ from the selected solvents

**Table S3.** Group contribution parameters and associated molar volume of IZV

| Individual functional group    | Frequency | $F_{di}, (J/cm^3)^{0.5} \cdot mol^{-1}$ | $F_{pi}, (J/cm^3)^{0.5} \cdot mol^{-1}$ | $E_{hi}, J/mol$ | $V_i, cm^3/mol$ |
|--------------------------------|-----------|-----------------------------------------|-----------------------------------------|-----------------|-----------------|
| -F                             | 2         | 102.0                                   | 493.9                                   | 6544.3          | 18.0            |
| -CH <sub>2</sub> -             | 1         | 234.6                                   | 0                                       | 0               | 16.1            |
| -OH                            | 1         | 76.5                                    | 1225.0                                  | 6060.0          | 10.0            |
| -CH-                           | 1         | 132.6                                   | 0                                       | 0               | -1              |
| >C<                            | 1         | -214.2                                  | 0                                       | 0               | -19.2           |
| =C<                            | 5         | -56.7                                   | 20.0                                    | 0               | -5.5            |
| -CH <sub>3</sub>               | 1         | 336.6                                   | 0                                       | 0               | 33.5            |
| >N-                            | 1         | 30                                      | 150.0                                   | 750.0           | -9              |
| =N-                            | 3         | 380                                     | 100                                     | 250             | 5.0             |
| =CH-                           | 10        | 255.0                                   | 38.0                                    | 0               | 13.5            |
| - S-                           | 1         | 815.9                                   | 196.0                                   | 297.5           | 12              |
| phenyl                         | 2         | 1515.0                                  | 50.0                                    | 20.9            | 71.4            |
| Ring closure 5 or more atoms 3 | 3         | 142.8                                   | 0                                       | 0               | 16              |
| Total                          |           | 8480.9                                  | 3932.7                                  | 20987.9         | 389.7           |

# 上海升德医药科技有限公司

SHANGHAI SEND PHARMACEUTICAL TECHNOLOGY CO.,LTD

Building 1, No. 800, Qingdai Road, Pudong, Shanghai 201318, China

Tel: +86-21-50266790

Fax: +86-21-50266790

## CERTIFICATE OF ANALYSIS

|                                   |                                                                                                                           |                             |                  |
|-----------------------------------|---------------------------------------------------------------------------------------------------------------------------|-----------------------------|------------------|
| <b>Product Name:</b><br>产品名称      | Isavuconazole<br>艾沙康唑                                                                                                     | <b>Batch No.:</b><br>生产批号   | SEND2019813-67-4 |
| <b>Quantity:</b><br>数量            | 500 g                                                                                                                     | <b>CAS NO.:</b><br>CAS 号    | 241479-67-4      |
| <b>Manufacture. Date:</b><br>生产日期 | 2019.08.13                                                                                                                | <b>Expiry Date:</b><br>到期日期 | 2022.08          |
| <b>Storage:</b><br>贮存             | Preserve In Well-Closed, Light-Resistant and Tight Containers.<br>Store In Cool & Dry Place.<br>保存在密闭、耐光、密封的容器中。存放于阴凉干燥处。 |                             |                  |

| ITEMS<br>检测项目                    | SPECIFICATION<br>产品规格                                       | RESULTS<br>检测结果 |
|----------------------------------|-------------------------------------------------------------|-----------------|
| <b>Appearance</b><br>外观          | White to yellow solid                                       | Conforms (符合)   |
| <b>Loss on d Drying</b><br>干燥失重  | $\leq 1.0\%$                                                | 0.1%            |
| <b>Related substance</b><br>相关物质 | Single Impurity $\leq 0.5\%$<br>Total Impurity $\leq 1.0\%$ | 0.06%<br>0.20%  |
| <b>Assay (HPLC)</b><br>含量        | $\geq 99\%$                                                 | Conforms        |
| <b>Conclusion:</b><br>结论         | The results conforms with enterprise standard.<br>结果符合企业标准  |                 |

QC: 赵丽梅

QA: 涂利

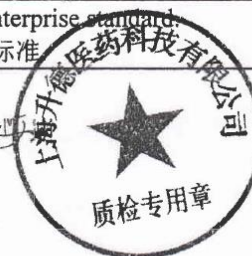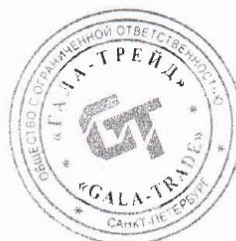

Figure S6. Analysis certificate of IVZ.

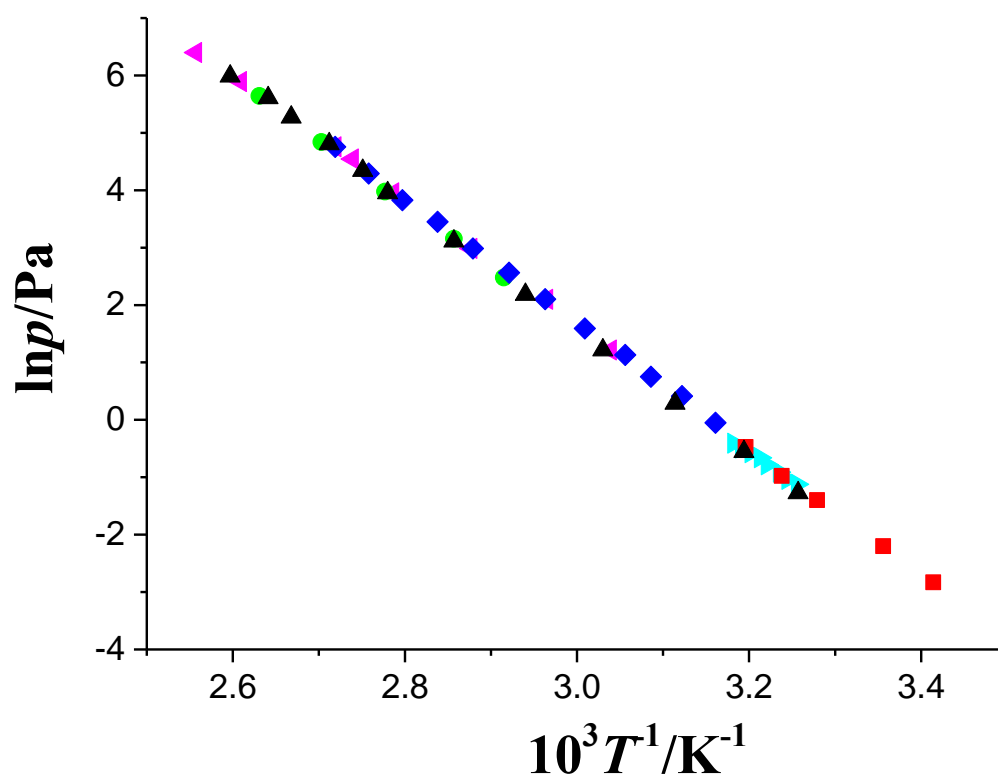

**Figure S7.** Experimental vapour pressures of the benzoic acid:  $\blacktriangle$  – our data;  $\blacktriangleright$  – from [Ribeiro da Silva, M.A.V. and etc. *Thermochim. Acta.* **1990**, *171*, 169–183],  $\blacktriangleleft$  – from [de Kruif, C.G. and etc. *J. Chem. Thermodyn.* **1982**, *14*, 201–206],  $\blacksquare$  – from [Colomina, M. and etc. *J. Chem. Thermodyn.* **1982**, *14*, 779–784.];  $\blacklozenge$  – from [Verevkin, S.P. and etc. *Thermochim. Acta.* **2015**, *622*, 18–30.];  $\bullet$  – from [Davies, M. and etc. *Trans. Faraday Soc.* **1954**, *50*, 1042–47].

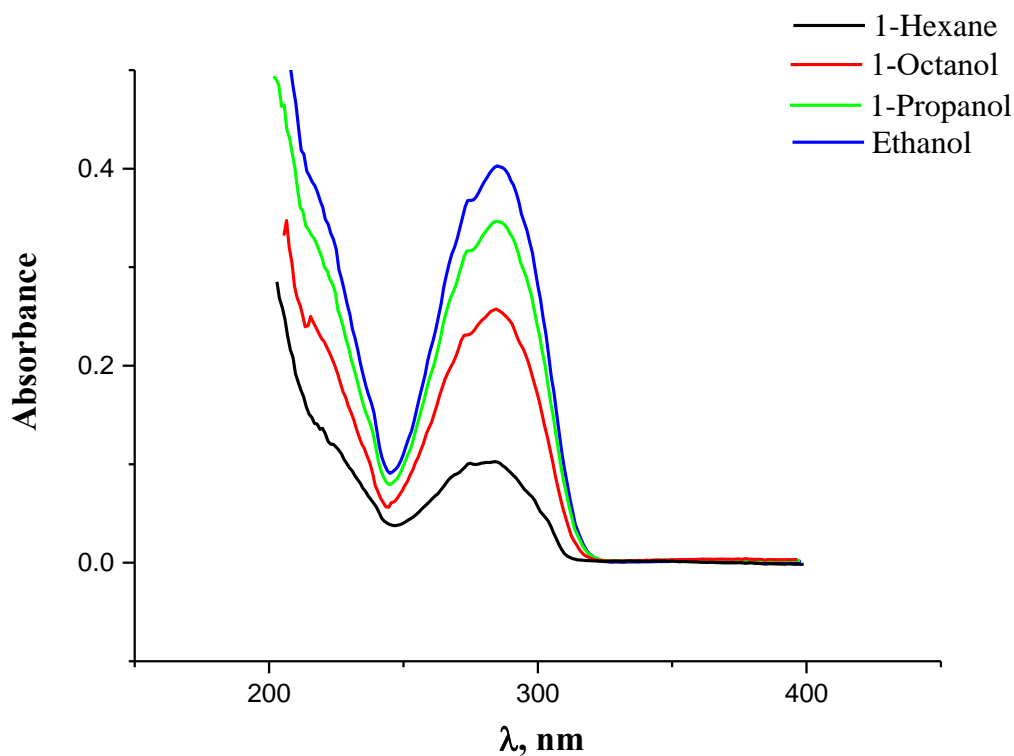

**Figure S8.** UV–visible absorption spectra of IVZ in organic solvents.

**Table S4.** Density of the investigated solvents at different temperatures and pressure  $p = 0.1$  MPa

| Solvent                    | $\rho/\text{g}\cdot\text{cm}^{-3}$ |          |          |          |          |
|----------------------------|------------------------------------|----------|----------|----------|----------|
|                            | 293.15 K                           | 298.15 K | 303.15 K | 308.15 K | 313.15 K |
| Buffer pH 1.2 <sup>a</sup> | 1.0022                             | 1.0010   | 0.9994   | 0.9979   | 0.9960   |
| Buffer pH 2.0 <sup>b</sup> | 1.0035                             | 1.0023   | 1.0008   | 0.9992   | 0.9973   |
| Buffer pH 7.4 <sup>c</sup> | 1.0060                             | 1.0048   | 1.0033   | 1.0016   | 0.9998   |
| Hexane                     | 0.6587                             | 0.6543   | 0.6495   | 0.6453   | 0.6432   |
| Ethanol                    | 0.7895                             | 0.7852   | 0.7809   | 0.7766   | 0.7722   |
| Propanol                   | 0.8037                             | 0.7995   | 0.7955   | 0.7915   | 0.7874   |
| 1-Octanol                  | 0.8251                             | 0.8217   | 0.8183   | 0.8148   | 0.8114   |

<sup>a</sup>Composition of aqueous buffer pH 1.2: KCl (3.73 g in 1 L) and  $0.1 \text{ mol}\cdot\text{L}^{-1}$  hydrochloric acid (850 mL in 1 L);

<sup>b</sup>Composition of aqueous buffer pH 2.0: KCl (6.57 g in 1 l) and  $0.1 \text{ mol}/\text{dm}^3$  hydrochloric acid (119.0 ml in 1 l);

<sup>c</sup>Composition of aqueous buffer pH 7.4:  $\text{KH}_2\text{PO}_4$  (9.1 g in 1 l) and  $\text{Na}_2\text{HPO}_4\cdot 12\text{H}_2\text{O}$  (23.6 g in 1 l);

Standard uncertainties:  $u(m)=0.01 \text{ mg}$ ,  $u(T) = 0.15 \text{ K}$ ,  $u(p) = 3 \text{ kPa}$  and  $u(\rho)= 0.002 \text{ g}\cdot\text{cm}^{-3}$ .
